# Supplementary material for: A hierarchically-assembled Fe–MoS2/Ni3S2/nickel foam electrocatalyst for efficient water splitting
Source: Royal Society of Chemistry journal article supplement (doi:10.1039/c9dt02201e), 2019-01-01
Supplement: c9dt02201e1.pdf [file c9dt02201e1.pdf]

## Electronic Supplementary Information

### **Hierarchically-assembled Fe-MoS<sub>2</sub>/Ni<sub>3</sub>S<sub>2</sub>/NF (nickel foam) electrocatalyst for efficient water splitting**

Jiang-Yan Xue,<sup>a,b</sup> Fei-Long Li,<sup>a</sup> Zhong-Yin Zhao,<sup>a</sup> Cong Li,<sup>a</sup> Chun-Yan Ni,<sup>a</sup> Hong-Wei Gu,<sup>a,\*</sup> Pierre Braunstein,<sup>c</sup> Xiao-Qing Huang<sup>a,\*</sup> and Jian-Ping Lang<sup>a,b,\*</sup>

<sup>a</sup>*College of Chemistry, Chemical Engineering and Materials Science, Soochow University, Suzhou 215123, People's Republic of China*

<sup>b</sup>*State Key Laboratory of Organometallic Chemistry, Shanghai Institute of Organic Chemistry, Chinese Academy of Sciences, Shanghai 200032, People's Republic of China*

<sup>c</sup>*Institut de Chimie (UMR 7177 CNRS), Université de Strasbourg 4, rue Blaise Pascal—CS 90032, 67081 Strasbourg, France*

\* Correspondence authors at: *College of Chemistry, Chemical Engineering and Materials Science, Soochow University, Suzhou 215123, People's Republic of China.*

Tel: +86-512-65882865; fax: +86-512-65880328.

*E-mail address:* [jplang@suda.edu.cn](mailto:jplang@suda.edu.cn) (J.P. Lang).

## Contents

|                 |                                                                                                                                                                                                                                                                                                                                                                                                                                              |     |
|-----------------|----------------------------------------------------------------------------------------------------------------------------------------------------------------------------------------------------------------------------------------------------------------------------------------------------------------------------------------------------------------------------------------------------------------------------------------------|-----|
| <b>Fig. S1</b>  | SEM image (above) and elemental mapping (down) of Fe-MoS <sub>2</sub> /Ni <sub>3</sub> S <sub>2</sub> /NF-2. ....                                                                                                                                                                                                                                                                                                                            | S3  |
| <b>Fig. S2</b>  | EDS spectrum of Fe-MoS <sub>2</sub> /Ni <sub>3</sub> S <sub>2</sub> /NF-2. ....                                                                                                                                                                                                                                                                                                                                                              | S4  |
| <b>Fig. S3</b>  | Full XPS spectra of Fe-MoS <sub>2</sub> /Ni <sub>3</sub> S <sub>2</sub> /NF-1, 2 and 3. ....                                                                                                                                                                                                                                                                                                                                                 | S5  |
| <b>Fig. S4</b>  | SEM images of Fe-MoS <sub>2</sub> /Ni <sub>3</sub> S <sub>2</sub> /NF-1, which showed the Ni <sub>3</sub> S <sub>2</sub> nanoplates circled in red. ....                                                                                                                                                                                                                                                                                     | S6  |
| <b>Fig. S5</b>  | SEM images of Fe-MoS <sub>2</sub> /Ni <sub>3</sub> S <sub>2</sub> /NF-3, which showed the Ni <sub>3</sub> S <sub>2</sub> nanoplates circled in red. ....                                                                                                                                                                                                                                                                                     | S6  |
| <b>Fig. S6</b>  | SEM image (above) and elemental mapping (down) of Fe-MoS <sub>2</sub> /Ni <sub>3</sub> S <sub>2</sub> /NF-1. ....                                                                                                                                                                                                                                                                                                                            | S7  |
| <b>Fig. S7</b>  | SEM image (above) and elemental mapping (down) of Fe-MoS <sub>2</sub> /Ni <sub>3</sub> S <sub>2</sub> /NF-3. ....                                                                                                                                                                                                                                                                                                                            | S8  |
| <b>Fig. S8</b>  | SEM images of the products under solutions with different volume ratios of DMF (mL) and H <sub>2</sub> O (mL) ....                                                                                                                                                                                                                                                                                                                           | S9  |
| <b>Fig. S9</b>  | HER Polarization curves of Fe-MoS <sub>2</sub> /Ni <sub>3</sub> S <sub>2</sub> /NF-2 and MoS <sub>2</sub> /Ni <sub>3</sub> S <sub>2</sub> /NF. ....                                                                                                                                                                                                                                                                                          | S10 |
| <b>Fig. S10</b> | OER Polarization curves of Fe-MoS <sub>2</sub> /Ni <sub>3</sub> S <sub>2</sub> /NF-2 and MoS <sub>2</sub> /Ni <sub>3</sub> S <sub>2</sub> /NF. ....                                                                                                                                                                                                                                                                                          | S10 |
| <b>Fig. S11</b> | Cyclic voltammograms curves of various samples at scan rates ranging from 20 to 100 mV·s <sup>-1</sup> with an interval point of 20 mV·s <sup>-1</sup> in 1.0 M KOH for the determination of the double layer capacitance: (a) bare NF, (b) Fe-MoS <sub>2</sub> /Ni <sub>3</sub> S <sub>2</sub> /NF-1, (c) Fe-MoS <sub>2</sub> /Ni <sub>3</sub> S <sub>2</sub> /NF-2 and (d) Fe-MoS <sub>2</sub> /Ni <sub>3</sub> S <sub>2</sub> /NF-3. .... | S11 |

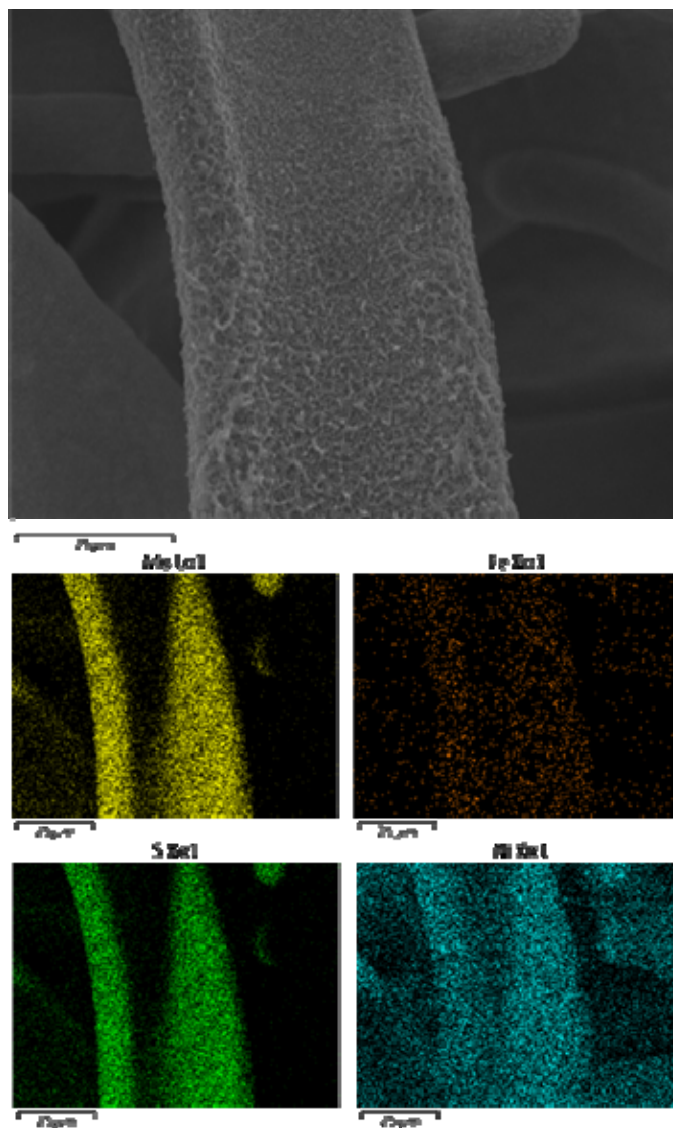

**Fig. S1** SEM image (above) and elemental mapping (down) of Fe-MoS<sub>2</sub>/Ni<sub>3</sub>S<sub>2</sub>/NF-2.

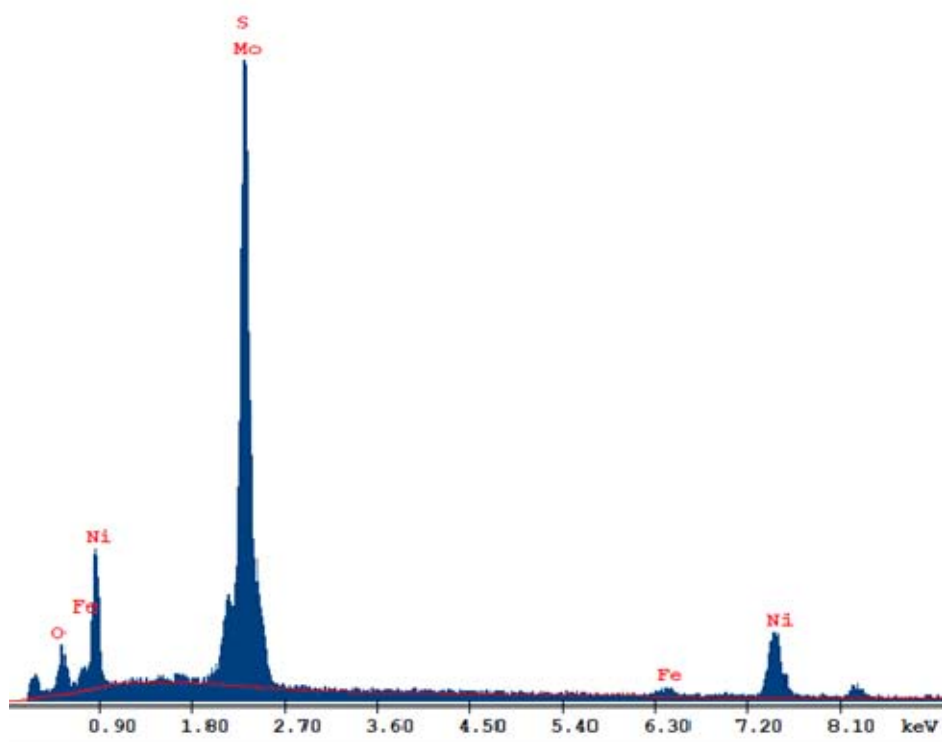

| Element | Wt %   | At %   |
|---------|--------|--------|
| O K     | 6.74   | 19.72  |
| MoL     | 30.31  | 14.79  |
| S K     | 22.90  | 33.43  |
| FeK     | 2.99   | 2.51   |
| NiK     | 37.06  | 29.55  |
| Total   | 100.00 | 100.00 |

**Fig. S2** EDS spectrum of Fe-MoS<sub>2</sub>/Ni<sub>3</sub>S<sub>2</sub>/NF-2.

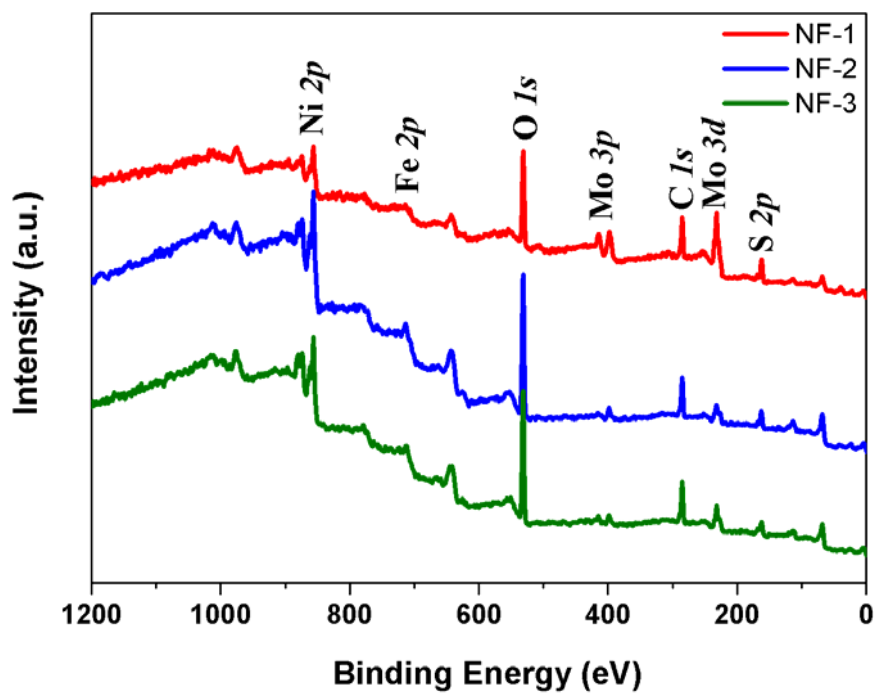

**Fig. S3** Full XPS spectra of Fe-MoS<sub>2</sub>/Ni<sub>3</sub>S<sub>2</sub>/NF-1, 2 and 3.

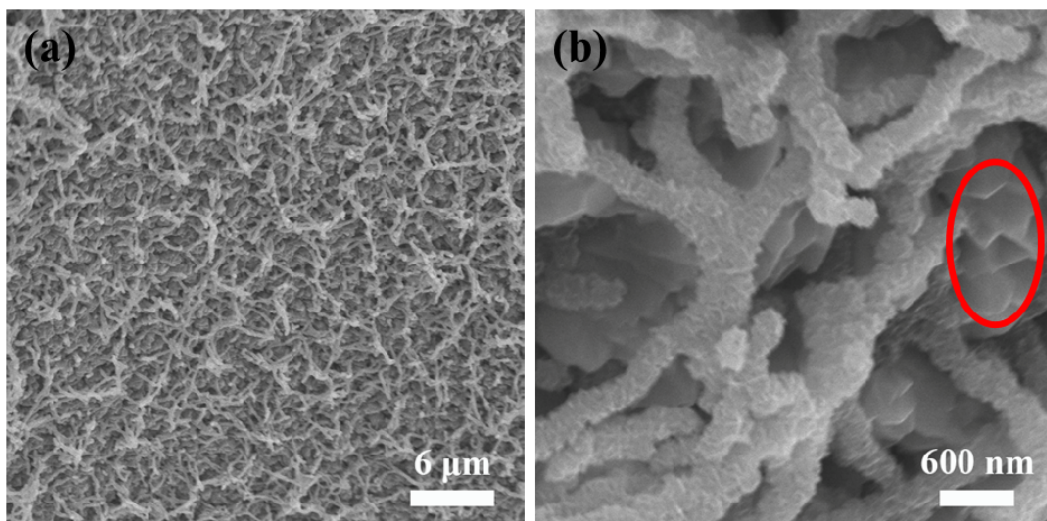

**Fig. S4** SEM images of Fe-MoS<sub>2</sub>/Ni<sub>3</sub>S<sub>2</sub>/NF-1, which showed the Ni<sub>3</sub>S<sub>2</sub> nanoplates circled in red.

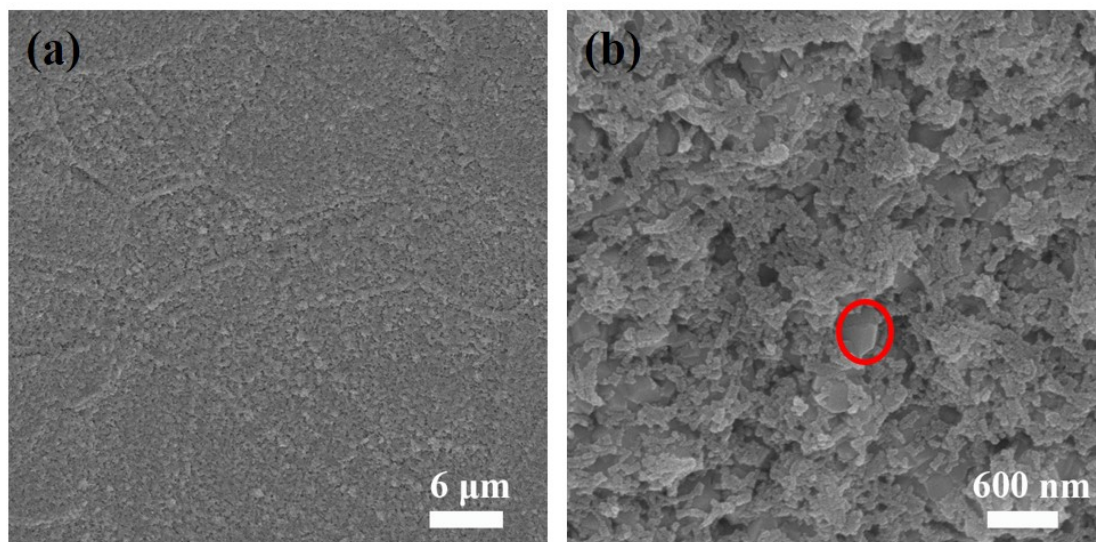

**Fig. S5** SEM images of Fe-MoS<sub>2</sub>/Ni<sub>3</sub>S<sub>2</sub>/NF-3, which showed the Ni<sub>3</sub>S<sub>2</sub> nanoplates circled in red.

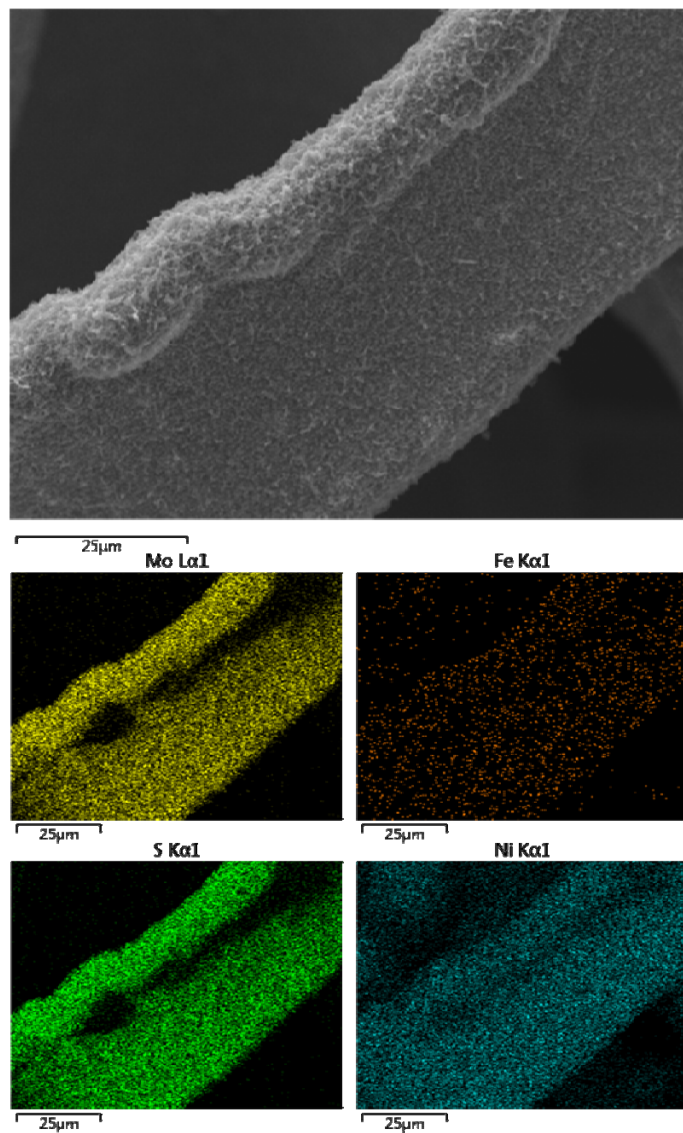

**Fig. S6** SEM image (above) and elemental mapping (down) of Fe-MoS<sub>2</sub>/Ni<sub>3</sub>S<sub>2</sub>/NF-1.

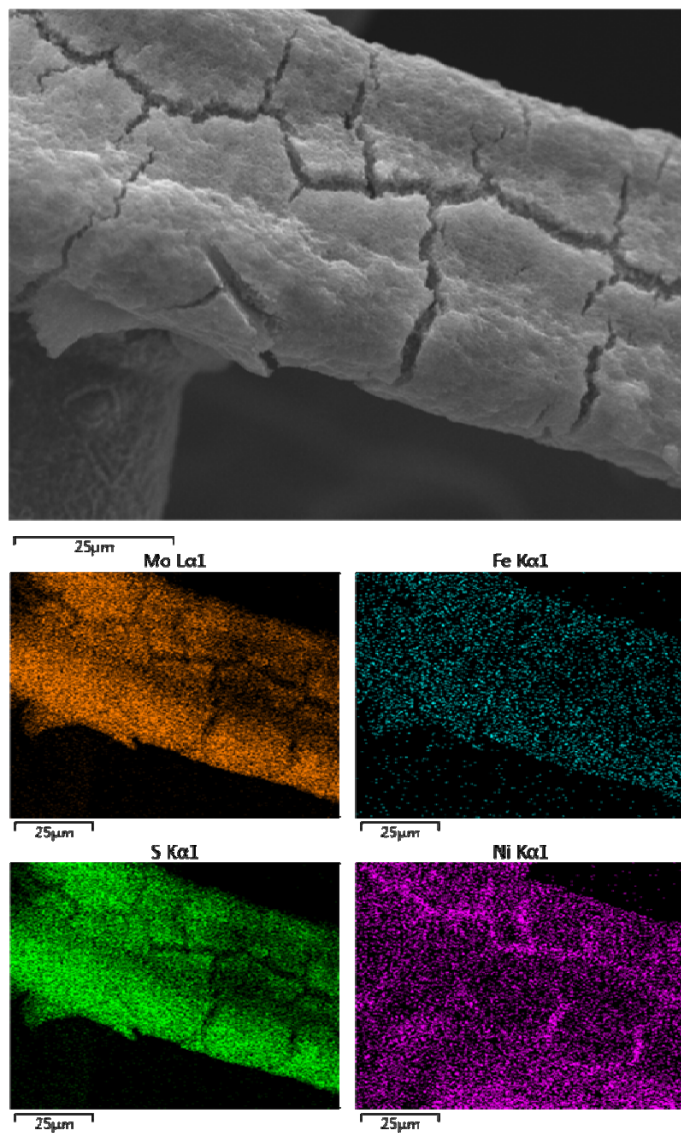

**Fig. S7** SEM image (above) and elemental mapping (down) of Fe-MoS<sub>2</sub>/Ni<sub>3</sub>S<sub>2</sub>/NF-3.



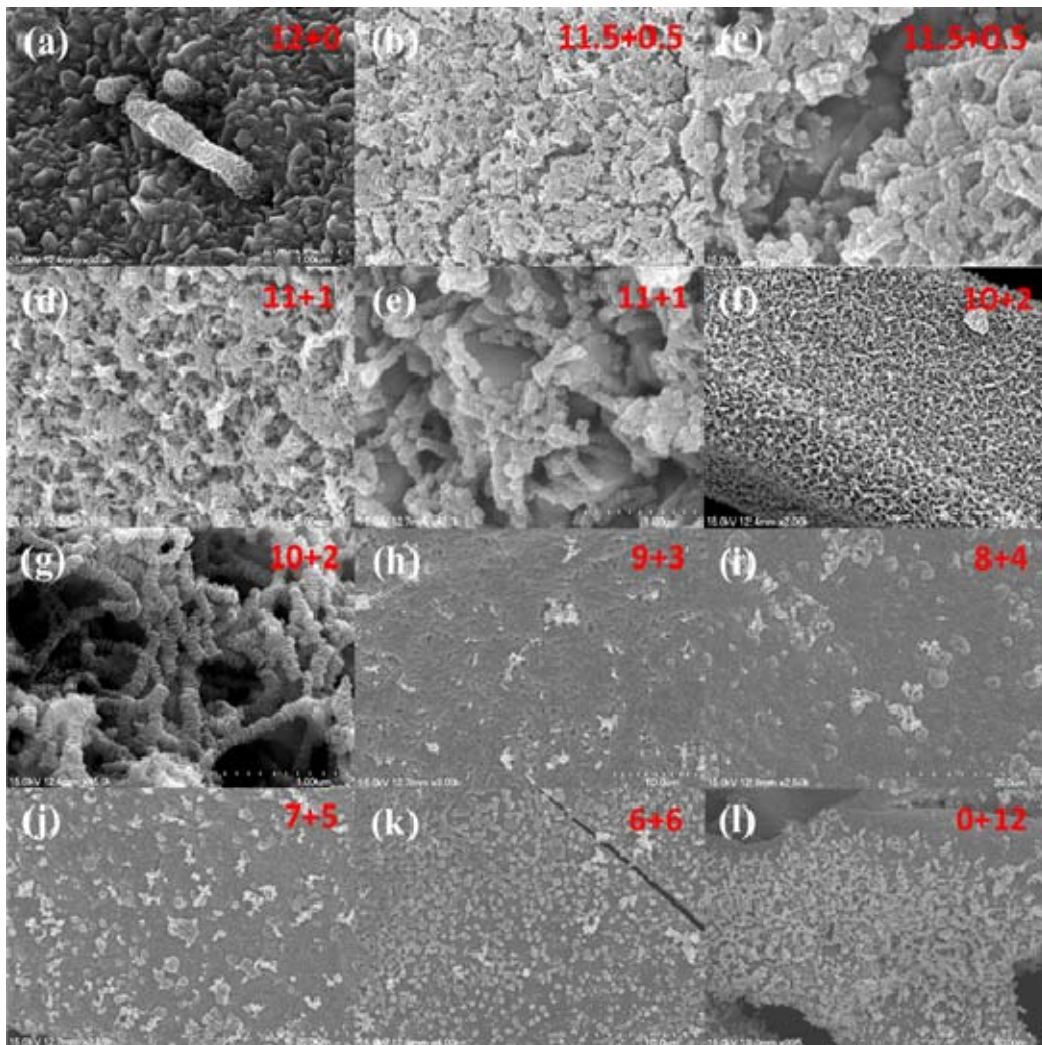

**Fig. S8** SEM images of the products under solutions with different volume ratios of DMF (mL) and H<sub>2</sub>O (mL).

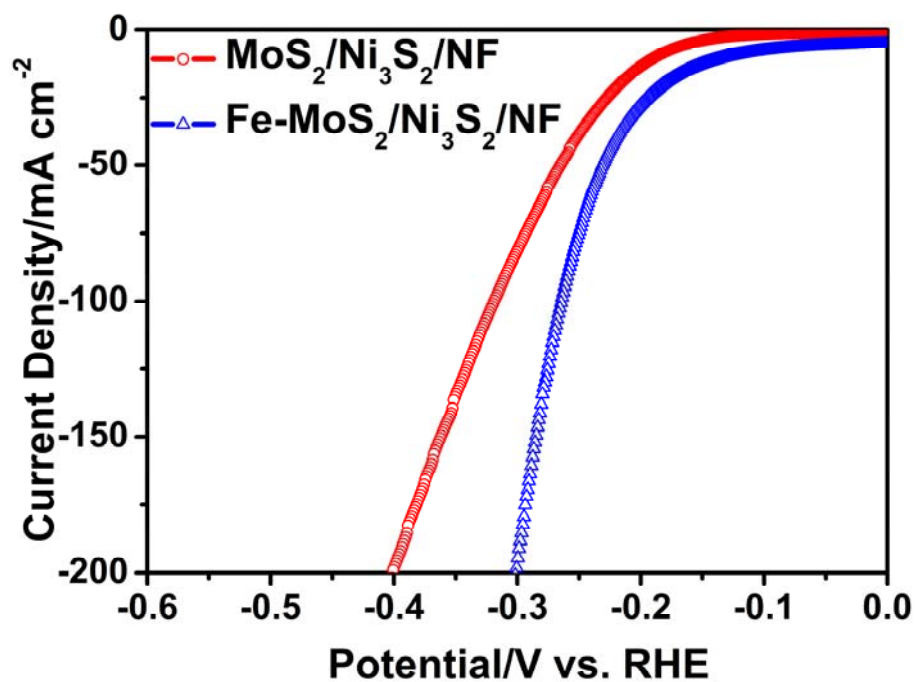

Fig. S9 HER Polarization curves of Fe-MoS<sub>2</sub>/Ni<sub>3</sub>S<sub>2</sub>/NF-2 and MoS<sub>2</sub>/Ni<sub>3</sub>S<sub>2</sub>/NF.

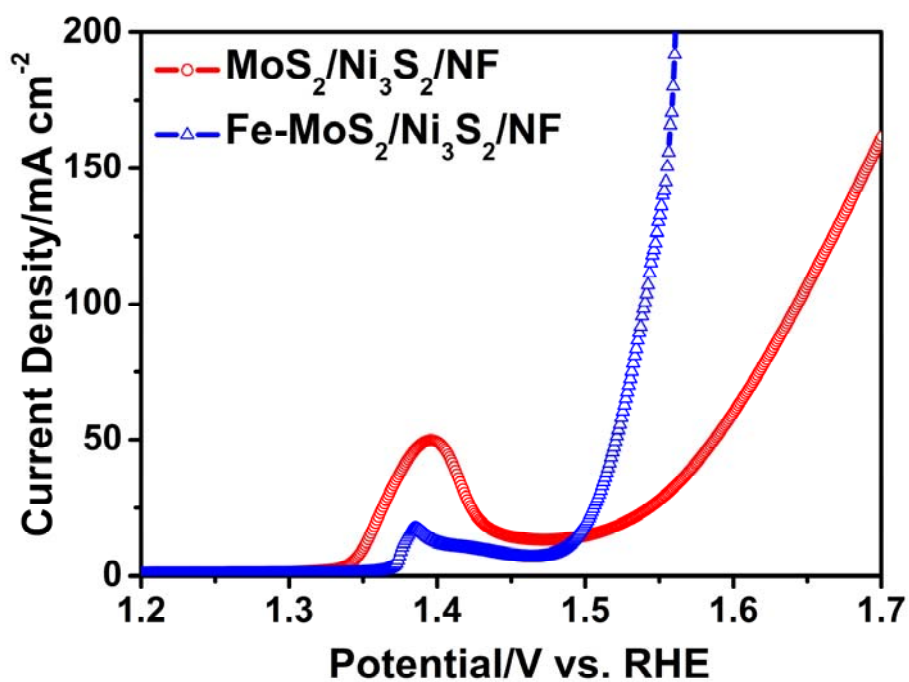

Fig. S10 OER Polarization curves of Fe-MoS<sub>2</sub>/Ni<sub>3</sub>S<sub>2</sub>/NF-2 and MoS<sub>2</sub>/Ni<sub>3</sub>S<sub>2</sub>/NF.

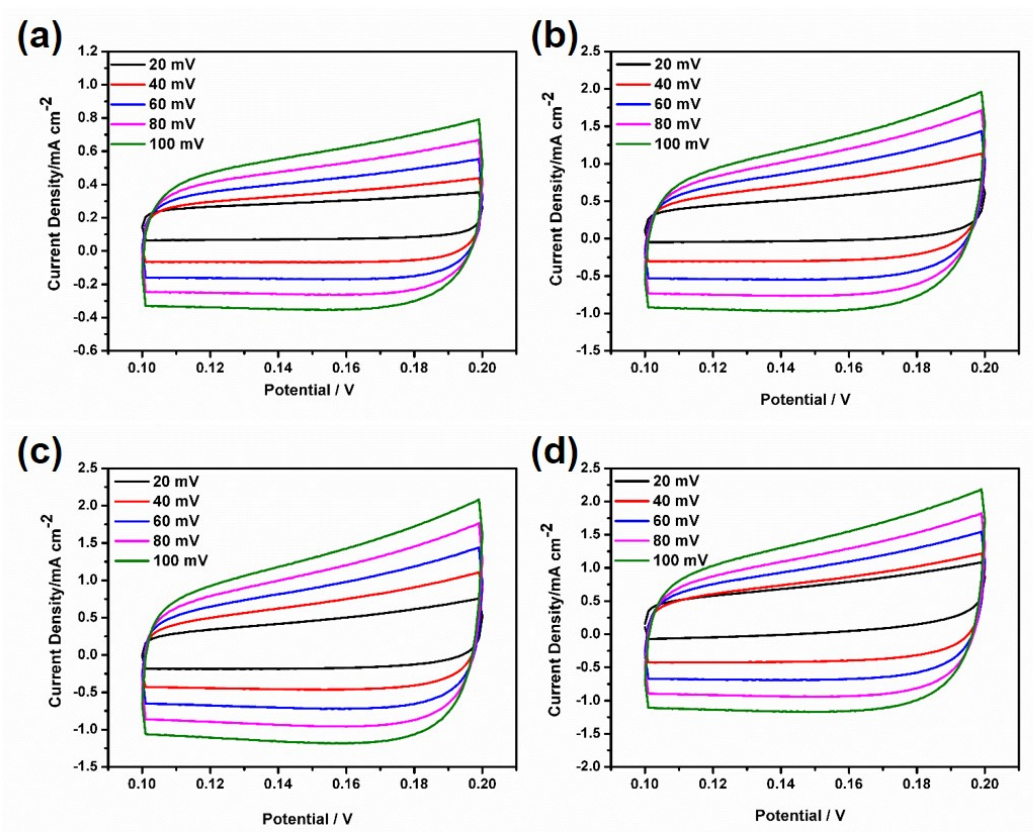

**Fig. S11** Cyclic voltammograms curves of various samples at scan rates ranging from 20 to 100  $\text{mV}\cdot\text{s}^{-1}$  with an interval point of 20  $\text{mV}\cdot\text{s}^{-1}$  in 1.0 M KOH for the determination of the double layer capacitance: (a) bare NF, (b) Fe-MoS<sub>2</sub>/Ni<sub>3</sub>S<sub>2</sub>/NF-1, (c) Fe-MoS<sub>2</sub>/Ni<sub>3</sub>S<sub>2</sub>/NF-2 and (d) Fe-MoS<sub>2</sub>/Ni<sub>3</sub>S<sub>2</sub>/NF-3.
